# Supplementary material
Source: PubMed Central journal article supplement (PMC4703453)
Supplement: NIHMS707557-supplement-1.pdf [file NIHMS707557-supplement-1.pdf]

**Supplemental Figure 1.** (A) Titration of OAC1. CB CD34<sup>+</sup> cells were cultured in cytokine-containing medium in the presence of the indicated concentrations of OAC1 and vehicle control (DMSO). Numbers of phenotypic HSC were analyzed by flow cytometry. n=3 CB samples, \* indicates p<0.05, \*\* indicates p<0.01.

**Supplemental Figure 2.** Expression of NANOG, SOX2 and levels of H3K4me3, H3K9me3 in OAC1-treated cells. Upregulation of NANOG (A) and SOX2 (B) expression were observed in OAC1-treated cells. n=3, \* indicates p<0.05, \*\* indicates p<0.01. The levels of H3K4me3 (C) and H3K9me3 (D) did not show significant differences between vehicle and OAC1-treated cells. n=3, N.S. indicates p>0.05.

**Supplemental Figure 3.** The number of Lin<sup>-</sup>CD34<sup>+</sup>CD38<sup>-</sup>CD45RA<sup>-</sup>CD90<sup>+</sup>CD49f<sup>+</sup> cells significantly increased in OAC1-treated group compared to vehicle-treated group while *ex vivo* culturing in both: (A) serum containing medium and (B) serum-free medium Stemline II. n=3, \*\* indicates p<0.01. (C) The number of phenotypically-defined endothelial progenitor cells (EPC, CD133<sup>+</sup>CD309<sup>+</sup>CD34<sup>+</sup>) significantly increased in OAC1-treated group compared to vehicle-treated group at Day 4. n=3, \* indicates p<0.05, \*\* indicates p<0.01. (D) The number of phenotypically-defined mesenchymal stromal cells (MSC, CD45<sup>-</sup>CD73<sup>+</sup>CD105<sup>+</sup>CD90<sup>+</sup>) did not show significant differences in OAC1-treated group compared to vehicle-treated group at Day 4. n=3, N.S. indicates p>0.05.

**Supplemental Figure 4.** (A) CFU numbers in 1000 cells of the progeny of an equivalent number of CD34<sup>+</sup> cells that were transfected with *HOXB4*, *OCT4* or scrambled (negative control) siRNA and expanded in the presence of vehicle control or OAC1 for 4 days. N.S. indicates p>0.05, \*\* indicates p<0.01. (B) Binding of OCT4 to the *HOXB4* promoter. The recruitment of OCT4 in the *HOXB4* promoter was assessed by ChIP analysis. CB CD34<sup>+</sup> cells were harvested and fixed, soluble chromatin was immunoprecipitated using anti-OCT4 or control Ab (normal mouse IgG). *HOXB4* promoter fragments were amplified by PCR. The primers used to amplify the -3000bp *HOXB4* promoter region were 5'- gtgtgagttcagcctgtctgg-3' and 5'- cctaggtctgagaaataacttgc -3'.

**Supplemental Figure 5.** Kaplan-Meier survival curves of NSG mice transplanted with human cord blood CD34<sup>+</sup> cells treated with vehicle control (n=16) or OAC1 (n=16). N.S. indicates p>0.05.

**Supplemental Figure 6.** Teratoma formation by H9 ES cells. CD34<sup>+</sup> cells from vehicle control cultures, OAC1 treatment cultures or human H9 ES cells were each injected subcutaneously into nude mice and were examined after 6 weeks. (A) Only H9 ES cells form teratomas in NSG mice (n=2). Teratomas were not observed in animals injected with CD34<sup>+</sup> cells from vehicle control cultures (n=2) or OAC1 treatment cultures (n=3). (B) The tissues representing all 3 embryonic germ layers, including gut epithelium (endoderm), cartilage (mesoderm), and secretory epithelium (ectoderm) in teratoma were shown.

A

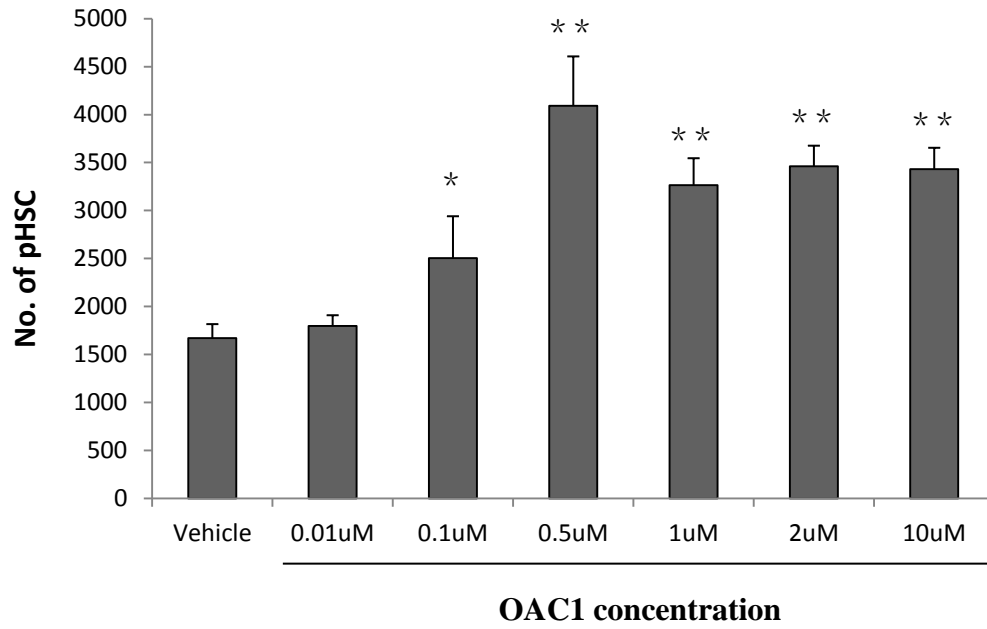

Supplemental Figure 1

**A**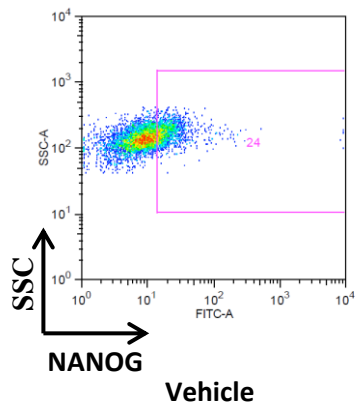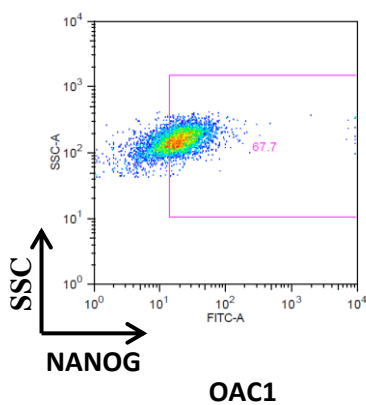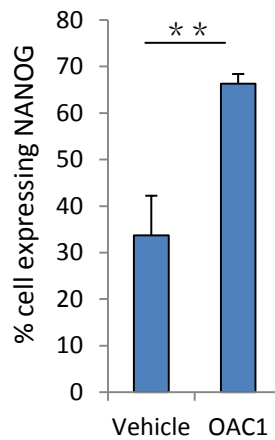**B**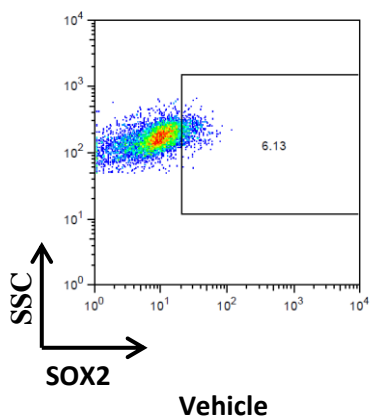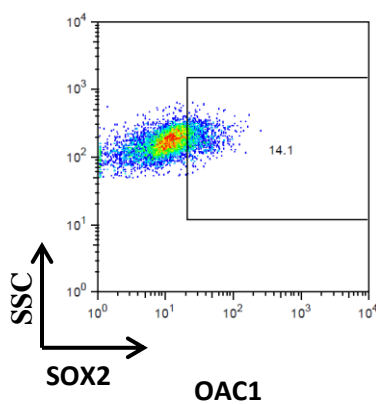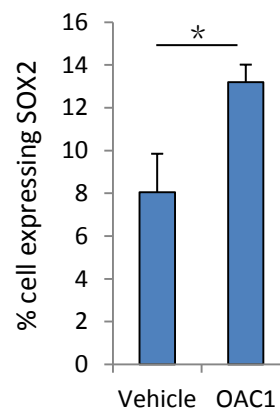**C**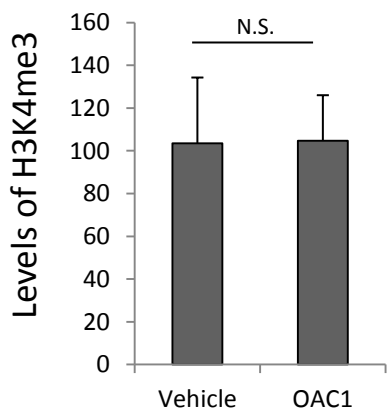**D**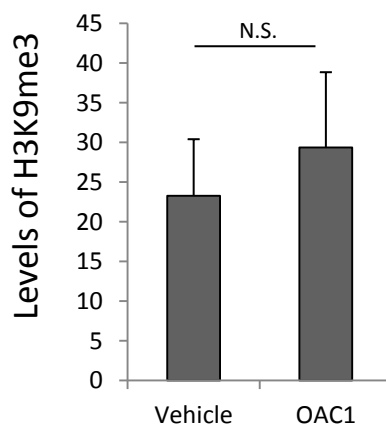

Supplemental Figure 2

**A****Serum containing cell culture**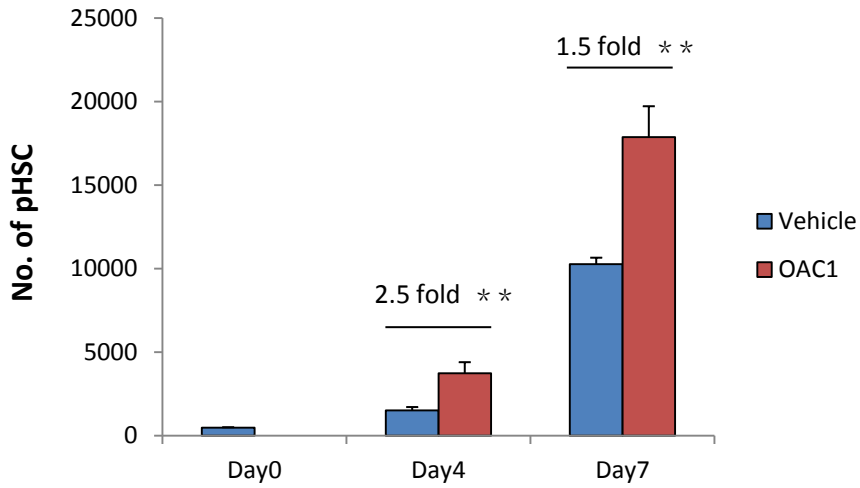**B****Serum free cell culture**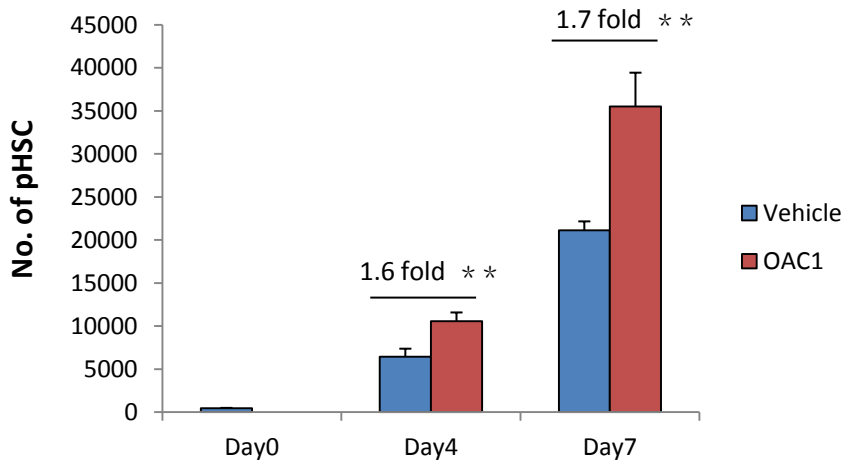**C**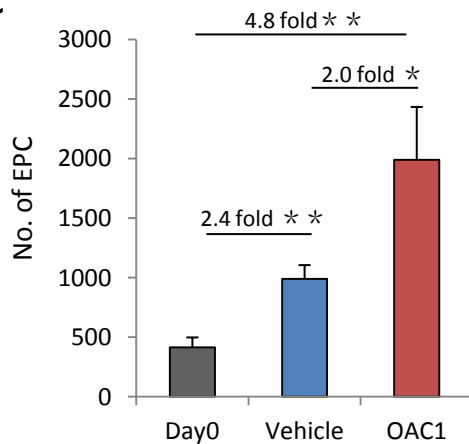**D**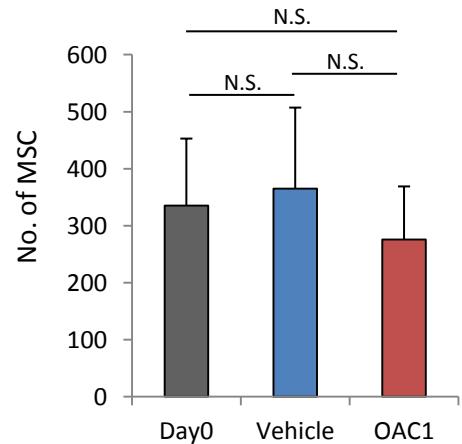**Supplemental Figure 3**

A

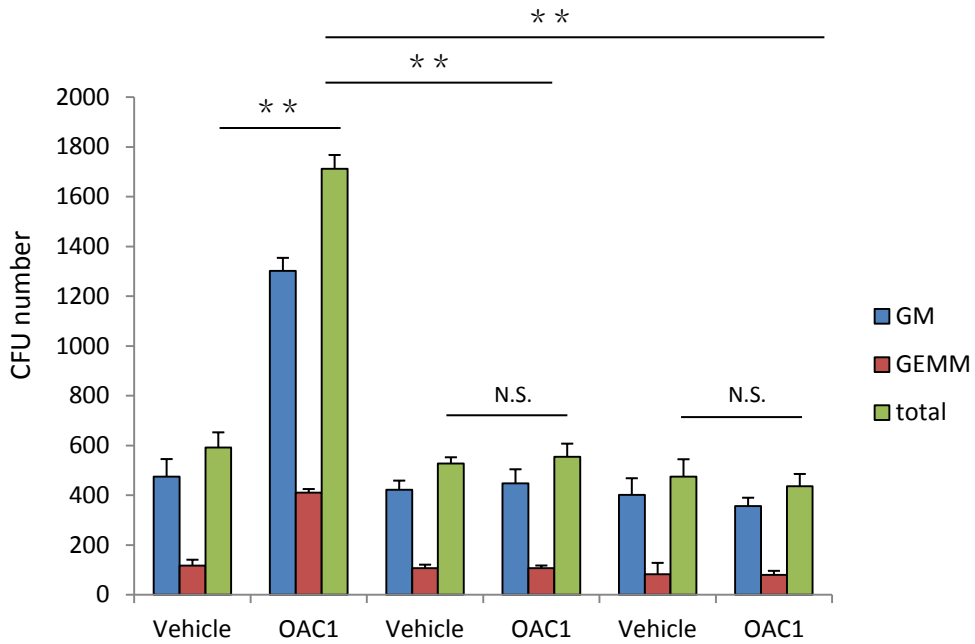

|                   |   |   |   |   |   |   |
|-------------------|---|---|---|---|---|---|
| scrambled control | + | + | - | - | - | - |
| HOXB4 siRNA       | - | - | + | + | - | - |
| OCT4 siRNA        | - | - | - | - | + | + |

B

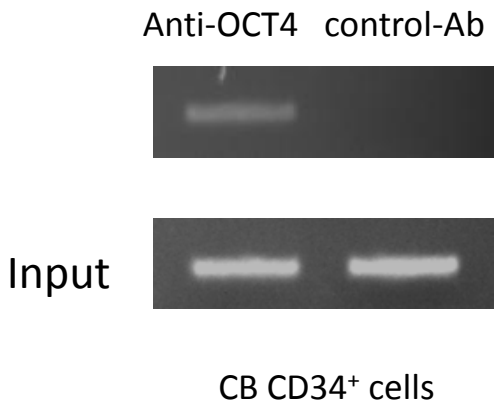

Supplemental Figure 4

A

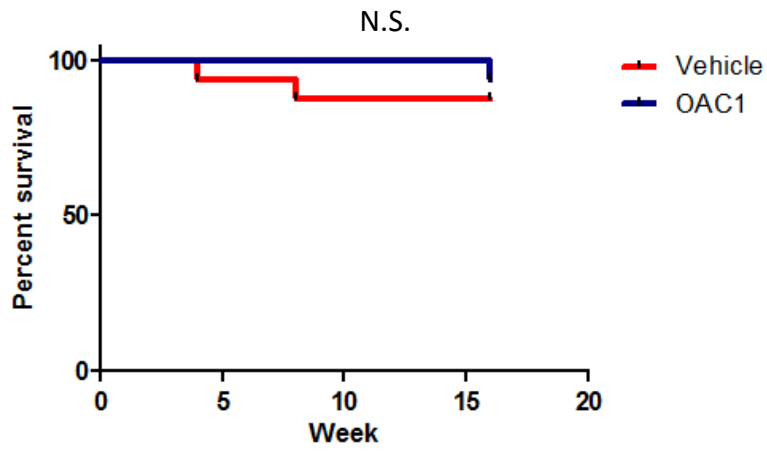

Supplemental Figure 5

A

H9 ES cells

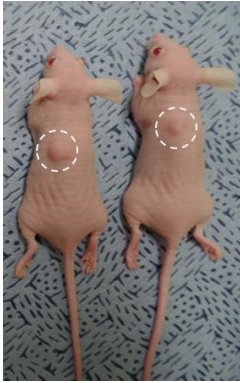

Vehicle-treated  
CD34<sup>+</sup> cells

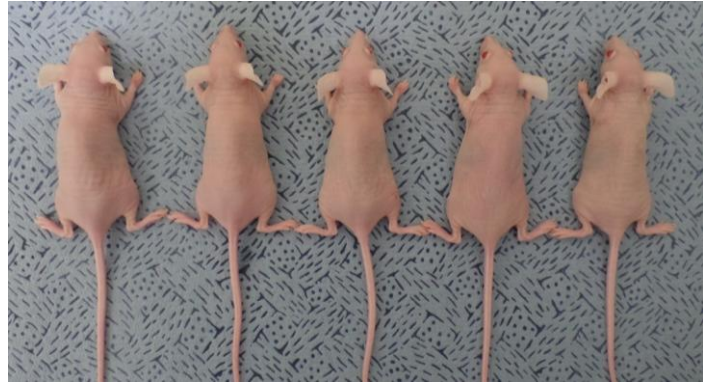

OAC1-treated  
CD34<sup>+</sup> cells

B

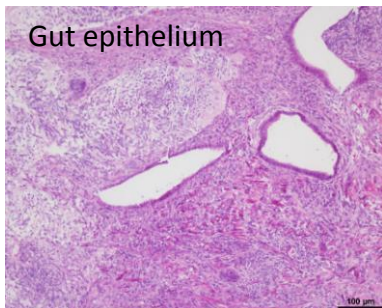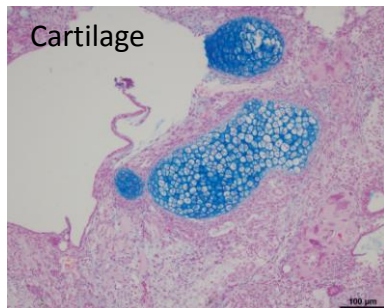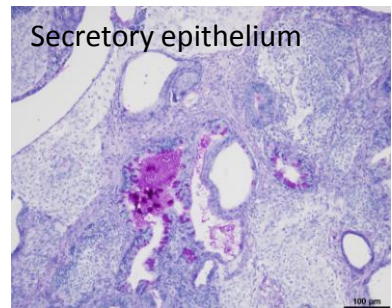

Supplemental Figure 6
